# Supplementary material
Source: HighWire-hosted journal article supplement (https://jnm.snmjournals.org/highwire/filestream/95367/field_highwire_adjunct_files/0/213496_Supplemental_Data.pdf)
Supplement: 213496_Supplemental_Data.pdf [file 213496_Supplemental_Data.pdf]

**SUPPLEMENTAL TABLE 1.** Chemical structures for peptide analogs used for PRRT in patients

| Compound                                    | Chemical structure                                                                                                                                                                                                                                                                                                                                                                                                                                                                                                                                                                                                                                                                                                                                                       |
|---------------------------------------------|--------------------------------------------------------------------------------------------------------------------------------------------------------------------------------------------------------------------------------------------------------------------------------------------------------------------------------------------------------------------------------------------------------------------------------------------------------------------------------------------------------------------------------------------------------------------------------------------------------------------------------------------------------------------------------------------------------------------------------------------------------------------------|
| DOTATATE                                    | 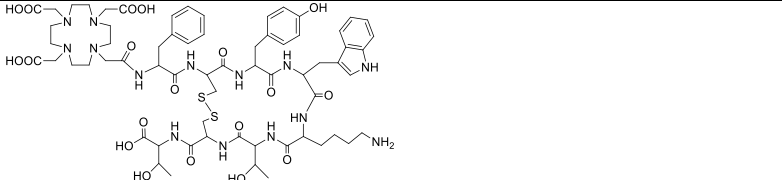 <p>The structure shows a DOTA chelator (1,4,7,10-tetraazacyclododecane-1,4,7,10-tetracarboxylic acid) with two carboxylic acid groups highlighted in red. It is linked via a peptide backbone to a DTPA-like moiety (2,2',6,6'-tetrakis(2-aminophenyl)-3,3'-diphenylsulfone) and a DOTA-like moiety (1,4,7,10-tetraazacyclododecane-1,4,7,10-tetracarboxylic acid) with two carboxylic acid groups highlighted in red. The DTPA moiety is further linked to a DTPA-like moiety (2,2',6,6'-tetrakis(2-aminophenyl)-3,3'-diphenylsulfone) and a DOTA-like moiety (1,4,7,10-tetraazacyclododecane-1,4,7,10-tetracarboxylic acid) with two carboxylic acid groups highlighted in red.</p> |
| DOTATOC                                     |  <p>The structure is identical to DOTATATE, showing a DOTA chelator with two carboxylic acid groups highlighted in red, linked to a DTPA-like moiety, which is further linked to another DTPA-like moiety and a DOTA-like moiety with two carboxylic acid groups highlighted in red.</p>                                                                                                                                                                                                                                                                                                                                                                                               |
| OPS201 (DOTA-JR11);<br>OPS202 (NODAGA-JR11) |  <p>This row displays four chemical structures. On the left, the DOTA structure (1,4,7,10-tetraazacyclododecane-1,4,7,10-tetracarboxylic acid) is shown with two carboxylic acid groups highlighted in red. Below it is the NODAGA structure (1,4,7,10-tetraazacyclododecane-1,4,7,10-tetracarboxylic acid) with two carboxylic acid groups highlighted in red. On the right, the OPS (JR11) structure is shown, which is a DTPA-like moiety (2,2',6,6'-tetrakis(2-aminophenyl)-3,3'-diphenylsulfone) linked to a DOTA-like moiety (1,4,7,10-tetraazacyclododecane-1,4,7,10-tetracarboxylic acid) with two carboxylic acid groups highlighted in red.</p>                              |
| CP04                                        |  <p>The structure shows a DOTA chelator (1,4,7,10-tetraazacyclododecane-1,4,7,10-tetracarboxylic acid) with two carboxylic acid groups highlighted in red. It is linked via a peptide backbone to a DTPA-like moiety (2,2',6,6'-tetrakis(2-aminophenyl)-3,3'-diphenylsulfone) and a DOTA-like moiety (1,4,7,10-tetraazacyclododecane-1,4,7,10-tetracarboxylic acid) with two carboxylic acid groups highlighted in red.</p>                                                                                                                                                                                                                                                          |
| DOTA-PP-F11N                                |  <p>The structure shows a DOTA chelator (1,4,7,10-tetraazacyclododecane-1,4,7,10-tetracarboxylic acid) with two carboxylic acid groups highlighted in red. It is linked via a peptide backbone to a DTPA-like moiety (2,2',6,6'-tetrakis(2-aminophenyl)-3,3'-diphenylsulfone) and a DOTA-like moiety (1,4,7,10-tetraazacyclododecane-1,4,7,10-tetracarboxylic acid) with two carboxylic acid groups highlighted in red.</p>                                                                                                                                                                                                                                                          |

|                                                                                   |                                                                                     |
|-----------------------------------------------------------------------------------|-------------------------------------------------------------------------------------|
| RM2                                                                               | 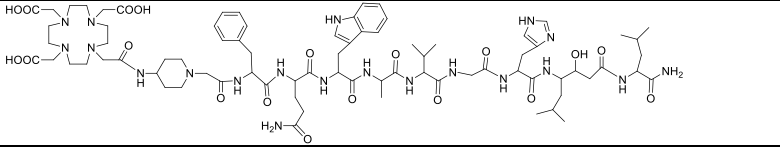  |
| NeoBOMB1                                                                          |   |
| DOTA-/DOTAGA-[Thi <sup>8</sup> , Met(O <sub>2</sub> ) <sup>11</sup> ]-substance P |   |
| Pentixather                                                                       |  |
